# Supplementary material
Source: publisher site journal article supplement (https://www.dovepress.com/article/388365)
Supplement: Supplementary file 1 [file get_supplementary_file.php]

**الالتزام بالأدوية بين مرضى ارتفاع ضغط الدم الملتحقين بالمراكز الصحية الاولية المختلفة في أبها ، المملكة العربية السعودية**

تهدف الدراسة الحالية إلى التحقق من الالتزام بالأدوية بين مرضى ارتفاع ضغط الدم الملتحقين بالمراكز الصحية الاولية المختلفة في أبها، المملكة العربية السعودية علماً بإن التعامل مع هذه البيانات سوف يكون سريًا، حفاظًا على خصوصيتكم، شاكرين لكم تعاونكم.

| **البيانات الاجتماعية الديموغرافية:** | |
| --- | --- |
| 1. العمر |  |
| 1. الجنس | 1. ذكر 2- أنثي |
| 1. محل السكن | 1. حضر 2- ريف |
| 1. المستوى التعليمي | 1. أمي / يقرأ ويكتب 2. ابتدائي / اعدادي / ثانوي 3. الجامعة / الدراسات العليا |
| 1. الوظيفة | 1. موظف في قطاع حكومي 2. موظف في قطاع خاص 3. لا يعمل 4. متقاعد |
| 1. الحالة الاجتماعية | 1. متزوج 2- مطلق / أرمل 3- أعزب |
| 1. الدخل الشهري | 1. أقل من 5000 ريال 2. 5000-7000 ريال 3. أكثر من 7000 ريال |
| 1. هل لديك امراض مزمنة أخري؟ | 1. نعم 2- لا |
| **تقييم الالتزام بالأدوية** | |
| 1. هل تنسى أحيانًا تناول أدويتك | 1. نعم 2- لا |
| 1. يفقد الناس أحيانًا تناول أدويتهم لأسباب أخرى غير النسيان. بالتفكير خلال الأسبوعين الماضيين، هل كانت هناك أي أيام لم تتناول فيها أدويتك؟ | 1. نعم 2- لا |
| 1. هل سبق لك أن توقفت عن تناول أدويتك دون إخبار طبيبك، لأنك شعرت بسوء عندما تناولتها؟ | 1. نعم 2- لا |
| 1. عندما تسافر أو تغادر المنزل، هل تنسى أحيانًا إحضار أدويتك؟ | 1. نعم 2- لا |
| 1. هل تناولت أدويتك أمس؟ | 1. نعم 2- لا |
| 1. عندما تشعر بأن حالتك الصحية تحت السيطرة، هل تتوقف أحيانًا عن تناول الأدوية؟ | 1. نعم 2- لا |
| 1. يعتبر تناول الأدوية يوميًا مصدر إزعاج حقيقي لبعض الأشخاص. هل شعرت يومًا بالإرهاق حيال الالتزام بخطة العلاج الخاصة بك؟ | 1. نعم 2- لا |
| 1. كم مرة تجد صعوبة في تذكر تناول جميع أدويتك؟ | 1. أبدا / نادرا 2. من حين لآخر 3. بعض الأحيان 4. عاده 5. طوال الوقت |
| **مقياس تصور المرض** | |
| 1. ما مدى تأثير مرضك على حياتك؟ | 0 1 2 3 4 5 6 7 8 9 10 |
| 1. إلى متى تعتقد أن مرضك سيستمر؟ | 0 1 2 3 4 5 6 7 8 9 10 |
| 1. ما مدى سيطرة شعورك على مرضك؟ | 0 1 2 3 4 5 6 7 8 9 10 |
| 1. إلى أي مدى تعتقد أن علاجك يمكن أن يساعد في مرضك؟ | 0 1 2 3 4 5 6 7 8 9 10 |
| 1. ما مدى شعورك بأعراض مرضك؟ | 0 1 2 3 4 5 6 7 8 9 10 |
| 1. ما مدى قلقك بشأن مرضك؟ | 0 1 2 3 4 5 6 7 8 9 10 |
| 1. إلى أي مدى تشعر أنك تفهم مرضك؟ | 0 1 2 3 4 5 6 7 8 9 10 |
| 1. ما مدى تأثير مرضك عليك عاطفيا؟ (على سبيل المثال ، هل تجعلك غاضبًا أم خائفًا اومنزعج أو مكتئب؟ | 0 1 2 3 4 5 6 7 8 9 10 |

**English Version of the data collection form**

**Adherence to medicines among hypertensive patients enrolled in various primary health centers in Abha, Saudi Arabia**

The current study aims to verify adherence to medicines among hypertensive patients enrolled in various primary health centers in Abha, Saudi Arabia, noting that the handling of this data will be confidential, in order to preserve your privacy, thanking you for your cooperation.

| **Sociodemographic data:** | |
| --- | --- |
| 1. Age |  |
| 1. Sex | 1. Male 2- Female |
| 1. Place of residence | 1. City 2- Village |
| 1. Educational level | 1. No formal education. 2. Primary/Preparatory/Secondary 3. University / Graduate Studies |
| 1. Occupation | 1. Employee in a government sector 2. Employee in the private sector 3. Unemployed 4. retired |
| 1. Marital status | 1. Married 2- Divorced / Widowed 3- Single |
| 1. Monthly income | 1. Less than 5000 riyals 2. 5000-7000 SAR 3. More than 7000 riyals |
| 1. Do you have other chronic diseases such as diabetes, heart disease etc ? | 1. Yes 2- No |
| **Medication adherence assessment** | |
| 1. Do you sometimes forget to take your medications? | 1. Yes 2- No |
| 1. People sometimes lose their medication for reasons other than forgetfulness. Thinking over the past two weeks , have there been any days when you haven't taken your medications? | 1. Yes 2- No |
| 1. Have you ever stopped taking your medications without telling your doctor, because you felt bad when you took them? | 1. Yes 2- No |
| 1. When you travel or leave home, do you sometimes forget to bring your medicines? | 1. Yes 2- No |
| 1. Did you take your medications yesterday? | 1. Yes 2- No |
| 1. When you feel that your health is under control, do you sometimes stop taking medications? | 1. Yes 2- No |
| 1. Taking medications daily is a real nuisance for some people. Have you ever felt overwhelmed by sticking to your treatment plan? | 1. Yes 2- No |
| 1. How often do you find it difficult to remember to take all your medications? | 1. Never 2. Very rarely 3. Sometimes 4. Usually 5. All the time |
| **Disease perception** scale | |
| 1. How much does your illness affect your life? | 0 1 2 3 4 5 6 7 8 9 10 |
| 1. How long do you think your illness will last? | 0 1 2 3 4 5 6 7 8 9 10 |
| 1. How much control does your feeling take over your illness? | 0 1 2 3 4 5 6 7 8 9 10 |
| 1. To what extent do you think your treatment can help with your illness? | 0 1 2 3 4 5 6 7 8 9 10 |
| 1. How well do you feel about the symptoms of your disease? | 0 1 2 3 4 5 6 7 8 9 10 |
| 1. How worried are you about your illness? | 0 1 2 3 4 5 6 7 8 9 10 |
| 1. To what extent do you feel you understand your illness? | 0 1 2 3 4 5 6 7 8 9 10 |
| 1. How much does your illness affect you emotionally? (For example, does it make you angry, scared, upset, or depressed? | 0 1 2 3 4 5 6 7 8 9 10 |
